# Supplementary material
Source: PubMed Central journal article supplement (PMC4787921)
Supplement: desa767715.ww1_default.pdf [file desa767715.ww1_default.pdf]

## Screen 6: Questions 5 - 9

How much do you agree or disagree with the following statements?

|                                                                                                                                                                    | Completely disagree 1 | 2                     | 3                     | 4                     | Completely agree 5    | Don't know            |
|--------------------------------------------------------------------------------------------------------------------------------------------------------------------|-----------------------|-----------------------|-----------------------|-----------------------|-----------------------|-----------------------|
| Everyone should have equal access to health care regardless of the cost.                                                                                           | <input type="radio"/> |
| Health authorities should use resources to achieve the largest health benefits.                                                                                    | <input type="radio"/> |
| The health budget should be used so that patients with the most serious illnesses receive treatment even if they don't experience the largest health improvements. | <input type="radio"/> |
| Patients with rare diseases should have the same right to treatment as others even if the treatments are more expensive.                                           | <input type="radio"/> |
| The health budget should be used so that patients who can receive the largest improvements receive treatment even if they don't have serious illnesses.            | <input type="radio"/> |

**Versions 2 - 5: Same as Version 1, but includes additional text in Screens 2 and 4 describing disease severity and expected treatment effectiveness. The extra language follows the sentence describing disease prevalence.**

**Version 2:** Diseases A and B are equally serious. Patients have difficulty moving about and experience extreme pain. The treatment for both diseases involves an injection every other week. The expected effects of treatment in both cases are that the patient will be pain-free and will be able to move about normally.

**Version 3:** Diseases A and B are equally serious. Patients have difficulty moving about and experience extreme pain. The treatment for both diseases involves an injection every other week. The expected effects of treatment in both cases are that the patient will have difficulty moving about and will experience some pain.

**Version 4:** Diseases A and B are equally serious. Patients have difficulty moving about and experience some pain. The treatment for both diseases involves an injection every other week. The expected effects of treatment in both cases are that the patient will be pain-free and will be able to move about normally.

**Version 5:** Diseases A and B are equally serious. Patients have difficulty moving about and experience some pain. The treatment for both diseases involves an injection every other week. The expected effects of treatment in both cases are that the patient will have difficulty moving about will be pain-free.

**Version 6 ("fixed funds" frame) has the same disease descriptions as Version 2 but changes the text for Screens 2 - 5 as follows:**

**Screen 2:** Imagine that there is a new treatment for Disease A, which is a rare disease (100 cases in Norway). In order to have enough funds to treat 100 patients with Disease A, the authorities must eliminate funding for 100 patients with Disease B, a common disease (10,000 cases in Norway).

- 100 patients with Disease A should receive the new treatment even though 100 patients with Disease B will lose treatment.
- The number of patients receiving treatment for Disease B should not be reduced even though the 100 patients with Disease A will not receive treatment.
- Indifferent

**Screen 3:** If it were possible to treat a portion of the patients with Disease A (rare) by reducing the same number of patients currently receiving treatment for Disease B (common), what would you recommend?

Screens 4 and 5 have parallel wording to Screens 2 and 3.
