# Supplementary material
Source: PubMed Central journal article supplement (PMC4787921)
Supplement: desa767715.ww2_default.pdf [file desa767715.ww2_default.pdf]

**Appendix 2. Odds-ratios from multinomial logistic regressions, dependent variable: “Which group should receive treatment?”**

| Independent Variables                 | Which group should be treated?<br>(Equal cost scenario) |                                    | Which group should be treated?<br>(Costly rare scenario) |                                    |
|---------------------------------------|---------------------------------------------------------|------------------------------------|----------------------------------------------------------|------------------------------------|
|                                       | Treat rare disease patients                             | Indifferent                        | Treat rare disease patients                              | Indifferent                        |
| <b>Gender</b>                         |                                                         |                                    |                                                          |                                    |
| Female<br>( <i>p-values</i> )         | 0.89<br><i>0.555</i>                                    | 1.26*<br><i>0.076</i>              | 0.89<br><i>0.585</i>                                     | 1.23*<br><i>0.061</i>              |
| <b>Severity</b>                       |                                                         |                                    |                                                          |                                    |
| Moderate                              | 0.68<br><i>0.197</i>                                    | 1.39<br><i>0.105</i>               | <b>0.38***</b><br><i>0.002</i>                           | <b>0.685**</b><br><i>0.041</i>     |
| Severe                                | 0.69<br><i>0.218</i>                                    | 1.47*<br><i>0.062</i>              | <b>0.34***</b><br><i>0.001</i>                           | 0.72*<br><i>0.076</i>              |
| <b>Effect</b>                         |                                                         |                                    |                                                          |                                    |
| Effective                             | 1.3<br><i>0.308</i>                                     | <b>1.49**</b><br><i>0.016</i>      | 1.1<br><i>0.701</i>                                      | 0.92<br><i>0.566</i>               |
| <b>Frame</b>                          |                                                         |                                    |                                                          |                                    |
| Fixed Funds                           | 0.58*<br><i>0.068</i>                                   | <b>0.17***</b><br><i>&lt;0.000</i> | <b>0.33***</b><br><i>0.006</i>                           | <b>0.43***</b><br><i>&lt;0.000</i> |
| <b>Maximize health</b>                | <b>0.77***</b><br><i>0.001</i>                          | <b>0.77***</b><br><i>&lt;0.000</i> | <b>0.58***</b><br><i>&lt;0.000</i>                       | <b>0.61***</b><br><i>&lt;0.000</i> |
| <b>Equal rights for rare diseases</b> | <b>1.41***</b><br><i>0.002</i>                          | <b>1.45***</b><br><i>&lt;0.000</i> | <b>1.64***</b><br><i>&lt;0.000</i>                       | <b>1.75***</b><br><i>&lt;0.000</i> |

Base value of dependent variable = “Treat common disease patients”

Base values of independent variables are Male (Gender), No info (Severity), No info (Effect), Extra funds (Frame).

The “less effective” effect level was dropped from the regression because of collinearity.

The Likert-scale rankings for “Maximize health” and “Equal rights for rare diseases” were treated as continuous variables.

\*, \*\*, \*\*\* indicate significance at the 90%, 95% and 99% levels, respectively
